# Supplementary material
Source: PubMed Central journal article supplement (PMC2781422)
Supplement: supp_M109.034165_Suppdata.pdf [file supp_M109.034165_Suppdata.pdf]

## SUPPLEMENTARY FIGURE LEGENDS

### Table 1. RT-PCR and q-PCR primers.

### Table 2. CHIP assay primers.

**Figure S1. Interaction assays of ERR $\alpha$ / $\beta$ , SIRT6, SIRT7 and SMILE through *in vivo* GST pull-down.** (A) HepG2 cells were cotransfected with expression vectors for Flag-ERR $\alpha$ , Flag-ERR $\beta$  and pEBG-SMILE (GST-SMILE) or pEBG alone (GST). (B) HepG2 cells were cotransfected with expression vectors encoding Flag-SIRT6, Flag-SIRT7 and pEBG-SMILE (GST-SMILE) or pEBG alone (GST). The complex formation (top panel, GST puri.) and the amount of Flag-ERR $\alpha$ , Flag-ERR $\beta$ , Flag-SIRT6, Flag-SIRT7 used for the *in vivo* binding assay (bottom panel, Lysate), were determined via Western blot analysis using an anti-Flag antibody. The same blot was stripped and reprobed with anti-GST antibody (middle panel) to confirm the expression levels of the GST fusion protein (GST-SMILE) and the GST control (GST). The data shown are representative of at least three independent experiments.

**Figure S2. Acetylation assays of FOXO1, ERR $\gamma$  and SMILE.** (A) Deacetylation of FOXO1 by wild type SIRT1. (B and C) No acetylation/deacetylation occurs with ERR $\gamma$  and SMILE. HepG2 cells were cotransfected with expression plasmids for Flag-FOXO1, Flag-ERR $\gamma$  or Flag-SMILE, together with expression vectors for wild type Myc-SIRT1 or the dominant negative mutant Myc-SIRT1H363Y as indicated. 36 h after transfection, the cells were treated with or without 10  $\mu$ M of EX527. Cell extracts prepared from the cells were subjected to immunoprecipitation assays using anti-Flag M2 antibody. The acetylation levels of FOXO1, ERR $\gamma$  and SMILE were detected by anti-acetylated lysine antibodies (upper panels). Precipitated Flag-FOXO1, Flag-ERR $\gamma$ , Flag-SMILE and the expression of myc-SIRT/SIRT1H363Y fusions in cell lysates were determined via Western blot analysis using indicated antibodies (middle and lower panels). The data shown are representative of at least three independent experiments.

**Figure S3. Homodimerization of SMILE is not required for the repression of SMILE on ERR $\gamma$ .** (A) Structure of human SMILE. The basic region and leucine zipper domains are shown. The leucine zipper mutant SMILE-L(239-267)V indicates the leucine residues between position 239 and 267 were mutated to valine, as indicated by the arrows. The numbers in the figure indicate the amino acid (aa) residues. (B) *In vivo* homodimerization possibility analysis of wt SMILE and SMILE-L(239-267)V. HepG2 cells were cotransfected with expression vectors for Flag-SMILE, Flag-SMILE-L(239-267)V with pEBG-SMILE (GST-SMILE wt) or pEBG-SMILE-L(239-267)V or pEBG alone (GST) as indicated. Protein interactions were examined via *in vivo* GST pull-down. The top and middle panels (GST puri) show GST beads-precipitated Flag-SMILE and GST fusions, respectively. The bottom panel shows the protein expression levels of Flag-SMILE and

Flag-SMILE-L(239-267)V in cell lysates. (C) The effect of SMILE-L(239-267)V on ERR $\gamma$  transactivation. HepG2 cells were cotransfected with sft4-Luc luciferase reporter vectors, together with expression vectors for ERR $\gamma$ , wt SMILE or SMILE-L(239-267)V as indicated. 48h after transfection, luciferase activity was measured. Wt, wild-type. The data shown are representative of at least three independent experiments.

**Figure S4. Transcription initiation site on the SMILE promoter.** Human SMILE sequences from -338 to +231 to the putative transcription start site. The guanine at the transcription start site (arrow) is designated +1. The translation start codon ATG is underlined with the encoded amino acids shown below the codon.

## Supplementary data

**Table 1. RT-PCR and q-PCR Primers**

| Name           | Forward Primers (5'-3') | Reverse Primers (5'-3') |
|----------------|-------------------------|-------------------------|
| ERR $\gamma$   | GACTTGACTCGCCACCTCTC    | GTGGTACCCAGAAGCGATGT    |
| PDK4           | CCC GCTGTCCATGAAGCAGC   | CCAATGTGGCTTGGGTTTCC    |
| PDK2           | GAAGAATGCGTCCCTGGCAG    | GGTCCGGATGGTGACCAGG     |
| SIRT1          | GCAGATTAGTAGGCGGCTTG    | TCTCCATCAGTCCCAAATCC    |
| SHP            | CTTCCTCAGGAACCT         | CCCAGTGAGCCTCCT         |
| SMILE          | AAAAGAGGCGGA GAAAGTCC   | CTCTGAAGAGCGAGGTGGTC    |
| $\beta$ -actin | GTCATCACCATTGGCAATGAG   | CGTCATACTCCTGCTTGCTG    |

**Table 2. CHIP Assay Primers**

| <b>Name</b> | <b>Positions Targeting<sup>1</sup></b> | <b>Forward Primers (5'-3')</b> | <b>Reverse Primers (5'-3')</b> |
|-------------|----------------------------------------|--------------------------------|--------------------------------|
| SMILE       | -996 → -735                            | CAGGAAGACGAAGGAAGACAAAGAG      | GCCAGGAAAGGCTATGAAGAGAG        |
|             | -220 → -19                             | TGTTGAGTCTGGGTATTGGGTGG        | TAGCCGGAAGTCAGTGGTTTTCG        |
| PDK4        | -1699 → -1493                          | TAGACGAAGAGGGCAAAGGA           | TGGTGAAGATGGGGTTTCTC           |
|             | -1056 → -886                           | GGAATCACAAAGCTGCATCA           | GCTGCAAAGGTCTTCCTTG            |

1 The transcription start site (TSS) is numbered +1.

**Figure. S1**

**A**

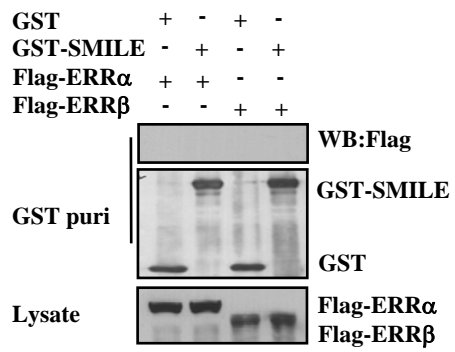

**B**

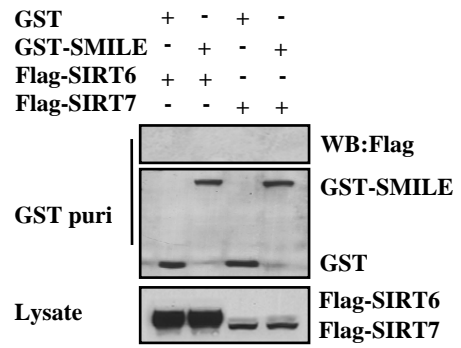

**Figure. S2**

**A**

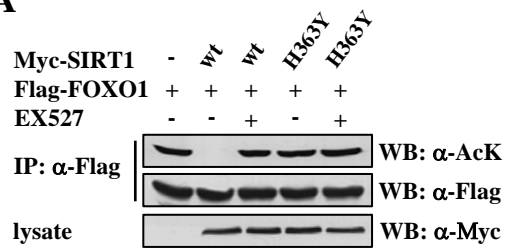

**B**

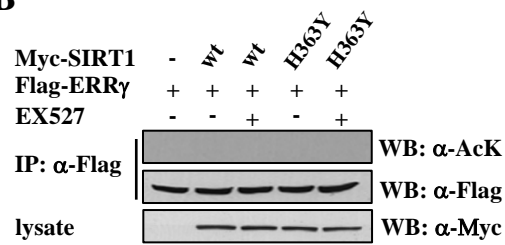

**C**

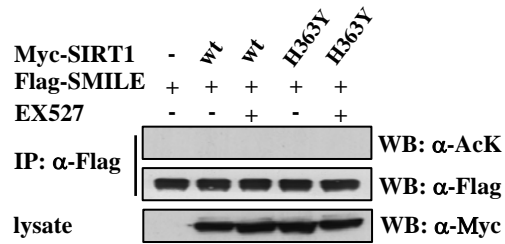

**Figure. S3**

**A**

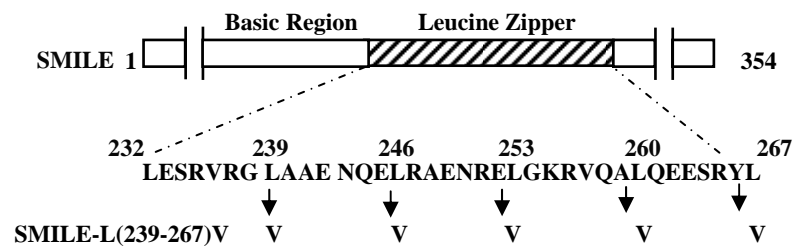

**B**

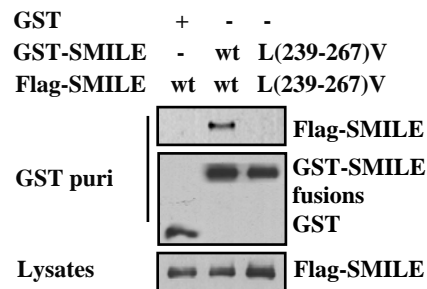

**C**

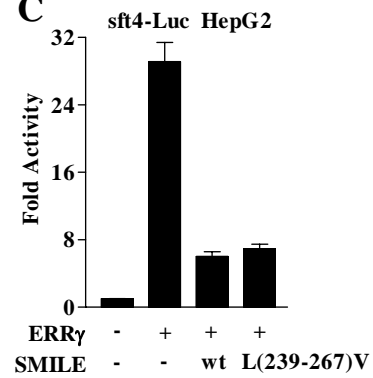

**Figure. S4**

|      |            |             |            |            |            |            |
|------|------------|-------------|------------|------------|------------|------------|
| -339 | CACACTGAAG | TACGCAGGGG  | TGTGGTGTCT | CATCTGCAAC | TTTAGGATGA | TTCAGCAAAA |
| -279 | AAAAAATTTA | CAAGCATTTA  | TGTAAAGATA | AAGCAAATAT | AGCAAAATGT | TGTGTTGAAC |
| -219 | TGTTGAGTCT | GGGTATTGGG  | TGGTATTGAA | TTAGGGTGGA | TAAATCTAGA | GACTTGTTAT |
| -159 | TTTTGCCGCT | GTTATTATGA  | CATCACTAGA | AAGCTGGAAT | TATTCCCACT | CTAAAGCACC |
| -99  | CTGAAATCTC | GCGACACTAC  | GGCCTGGTGG | CGCGCGAAAC | GCGGTGGGCG | GGACTGGGGC |
| -39  | GAAAACCACT | GACTTCCGGC  | TACGCCGTTG | TCTGGGTGGC | GCGGTCGAGT | CATCGCAGGG |
| +21  | CCTCACCGCT | TCGTTCTCCC  | GTCCCTCCCC | GCGCCTTGGC | GCGGGGGGTC | GACTAGCCAA |
| +81  | GTGAGGCGGG | AGGCGACTCG  | GACCTTTCCC | TGCATTTCGT | TTCGGCCAGT | GCCGGGGGCT |
| +141 | ACCCGCCCTG | GGGCCTGGGA  | TCCTTGGGGC | CCGTGAGGCC | CACTCTTAGC | GGCCGGGGCC |
| +201 | TACCGCGGCC | CGCCG CTGGC | CCTCATGAGG |            |            |            |

M
